# Supplementary material for: Genetics of Lifetime Reproductive Performance in Italian Heavy Draught Horse Mares
Source: MDPI journal article supplement (doi:10.3390/ani10061085), 2020-06-23
Supplement: s1 [file s1]

# Supplementary Files: Genetics of Lifetime Reproductive Performance in Italian Heavy Draught Horse Mares

Roberto Mantovani, Fabio Folla, Giuseppe Pigozzi, Shogo Tsuruta and Cristina Sartori

**Table 1.** Comparison of different models run on the lifetime fertility rate (LFR) obtained combining actual and predicted number of foals after 6 breeding seasons and considering different prediction methods for incomplete reproductive career (by coefficients; LFR-C; by equations; LFR-E) and arcsine transformation of both the LFR-C (Arcsine LFR-C) and the LFR-E (Arcsine LFR-E).

| Item                                                             | LFR-C  | LRF-E  | Arcsine LFR-C | Arcsine LFR-E |
|------------------------------------------------------------------|--------|--------|---------------|---------------|
| Model 1 (AF + EU-BY <sub>fixed</sub> + a + e) <sup>1</sup>       |        |        |               |               |
| Genetic Variance <sup>2</sup>                                    | 5.018  | 4.855  | 9.378         | 9.226         |
| Residual Variance <sup>2</sup>                                   | 14.99  | 14.52  | 28.33         | 27.77         |
| Heritability                                                     | 0.251  | 0.251  | 0.249         | 0.249         |
| AIC                                                              | -2847  | -2939  | -1006         | -1062         |
| Model 2 (AF + EU-BY <sub>rnd</sub> + a + e) <sup>1</sup>         |        |        |               |               |
| Herd Variance <sup>2</sup>                                       | 0.177  | 0.192  | 0.332         | 0.341         |
| Genetic Variance <sup>2</sup>                                    | 5.289  | 5.069  | 9.652         | 9.459         |
| Residual Variance <sup>2</sup>                                   | 14.82  | 14.41  | 28.22         | 27.71         |
| Heritability                                                     | 0.261  | 0.258  | 0.253         | 0.252         |
| AIC                                                              | -3287  | -3379  | -1367         | -1423         |
| Model 3 (AF + EU-BY <sub>rnd</sub> + F + a + e) <sup>1</sup>     |        |        |               |               |
| Herd Variance <sup>2</sup>                                       | 0.168  | 0.184  | 0.313         | 0.324         |
| Genetic Variance <sup>2</sup>                                    | 5.394  | 5.161  | 9.863         | 9.633         |
| Residual Variance <sup>2</sup>                                   | 14.72  | 14.33  | 28.03         | 27.56         |
| Heritability                                                     | 0.266  | 0.262  | 0.258         | 0.257         |
| AIC                                                              | -3288  | -3379  | -1368         | -1423         |
| Model 4 (AF + EU-BY <sub>rnd</sub> + F + a + d + e) <sup>1</sup> |        |        |               |               |
| Herd Variance <sup>2</sup>                                       | 0.141  | 0.160  | 0.259         | 0.276         |
| Genetic Variance <sup>2</sup>                                    | 4.848  | 4.693  | 8.975         | 8.829         |
| Dominance Variance <sup>2</sup>                                  | 1.628  | 1.358  | 2.896         | 2.573         |
| Residual Variance <sup>2</sup>                                   | 13.426 | 14.259 | 25.660        | 25.463        |
| Heritability                                                     | 0.242  | 0.241  | 0.238         | 0.237         |
| AIC                                                              | -3290  | -3380  | -1370         | -1424         |

<sup>1</sup> AF: age at first foaling; EU-BY: environmental unit by birth year, considered as fixed (BY<sub>fixed</sub>) or random (BY<sub>rnd</sub>); F: individual inbreeding; a: additive variance; d: dominance variance; e: residual error. <sup>2</sup> Multiplied by 10<sup>3</sup>.

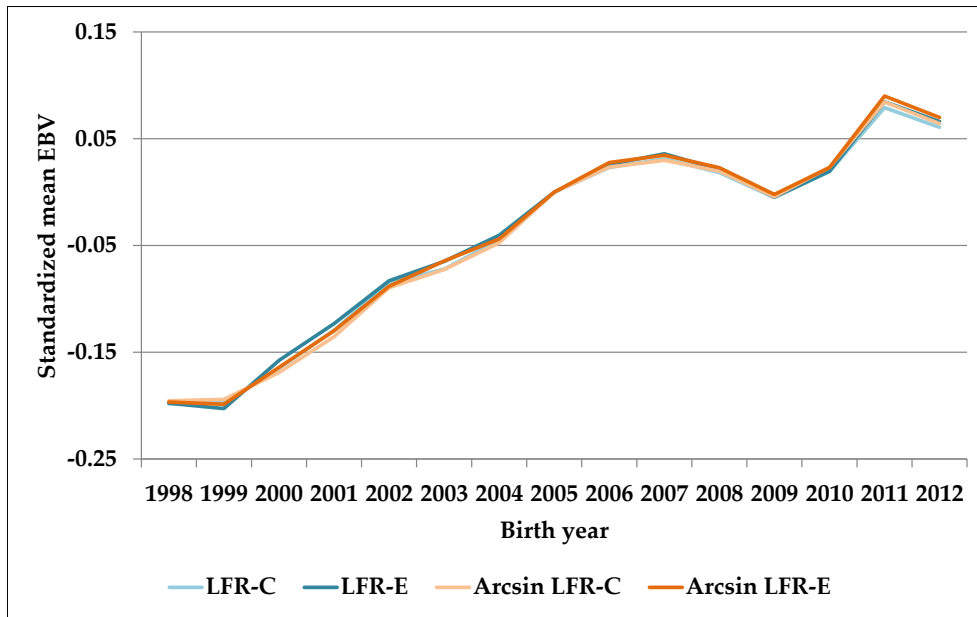

**Figure 1.** Genetic trends obtained from mean standardized EBVs by birth year in Italian Heavy Draught Horse mares with record (n = 2515) tracing back 15 years from the last birth year with a minimum number of 100 mares. Trends have been obtained for different expression of lifetime fertility rate (LFR), obtained combining actual and predicted number of foals after the 6<sup>th</sup> reproductive season and considering different prediction methods for incomplete reproductive career (by coefficients; LFR-C; by equations; LFR-E) and arcsine transformation of the LFR-C (Arcsine LFR-C) and the LFR-E (Arcsine LFR-E).

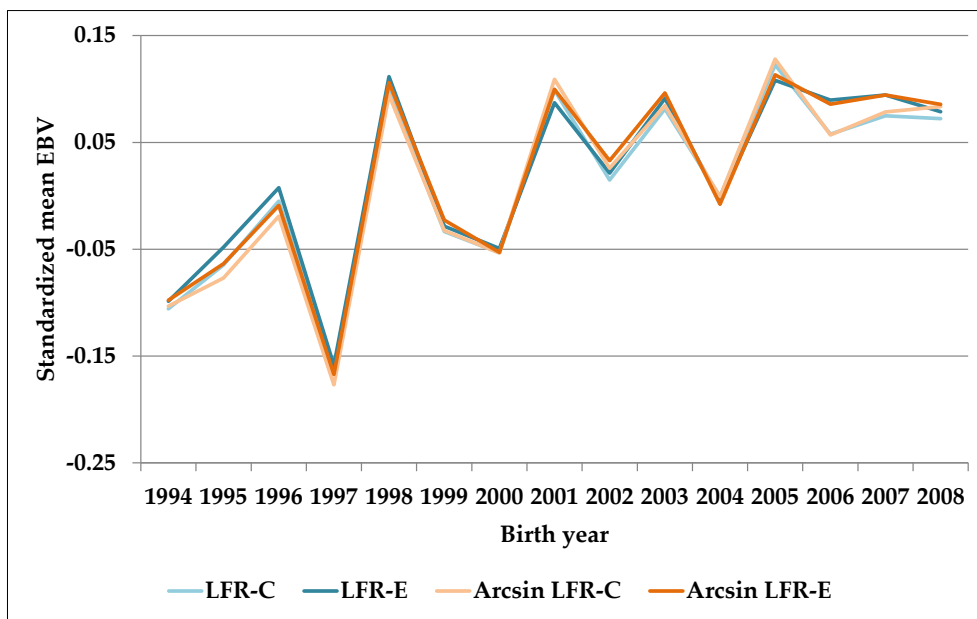

**Figure 2.** Genetic trends obtained from mean standardized EBVs by birth year in Italian Heavy Draught Horse stallion sires of mares with record (n = 399) tracing back 15 years from the last birth year with a minimum number of 15 stallions. Trends have been obtained for different expression of lifetime fertility rate (LFR), obtained combining actual and predicted number of foals after the 6<sup>th</sup> reproductive season and considering different prediction methods for incomplete reproductive career (by coefficients; LFR-C; by equations; LFR-E) and arcsine transformation of the LFR-C (Arcsine LFR-C) and the LFR-E (Arcsine LFR-E).
